# Supplementary material
Source: PubMed Central journal article supplement (PMC7513365)
Supplement: ao0c02713_si_001.pdf [file ao0c02713_si_001.pdf]

## Supporting Information

### Preparation and Properties of Cellulose-based Films Regenerated from Waste Corrugated Cardboard using [Amim]Cl/CaCl<sub>2</sub>

Hao Xu<sup>‡</sup>, Lijie Huang<sup>‡,\*</sup>, Mingzi Xu<sup>§</sup>, Minghui Qi<sup>‡</sup>, Tan Yi<sup>‡</sup>, Qi Mo<sup>§</sup>, Hanyu Zhao<sup>‡</sup>,  
Chongxing Huang<sup>‡,§</sup>, Shuangfei Wang<sup>§</sup>, Yang Liu<sup>‡</sup>

<sup>‡</sup> *College of Light Industry and Food Engineering, Guangxi University, Nanning, 530004, China*

<sup>§</sup> *Guangxi Key Laboratory of Clean Pulp & Papermaking and Pollution Control, Nanning 530004, China*

\*Email: [jiely165@163.com](mailto:jiely165@163.com)

## Supporting information content

**Figure S1.** Polarizing micrographs of the P-WCC in [Amim]Cl at 90 °C after 0 min (a), 10 min (b), 40 min (c).

**Figure S2.** XRD spectrum of P-WCC (a) and BM-P-WCC (b).

**Figure S3.**  $^1\text{H}$  NMR spectra of [Amim]Cl (a) and recovered [Amim]Cl (b). (Photograph courtesy of 'Mingzi Xu'. Copyright 2020. The graphic is free domain)

**Figure S4.** FTIR spectra of [Amim]Cl (a) and recovered [Amim]Cl (b).

**Figure S5.** Surface roughness of the R-WCC film.

**Figure S6.** Transmittance (a) and visual pattern (b) of the R-WCC film.

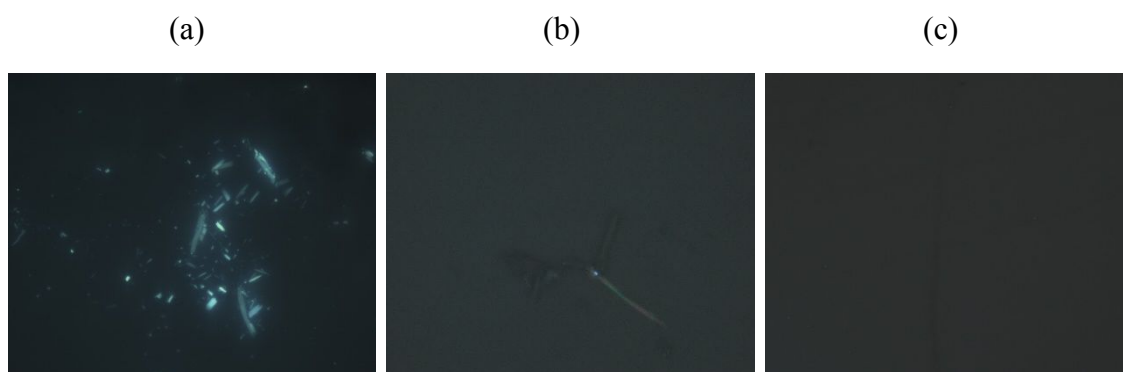

Figure S1. Polarizing micrographs of the P-WCC in [Amim]Cl at 90 °C after 0 min (a), 10 min (b), 40 min (c).

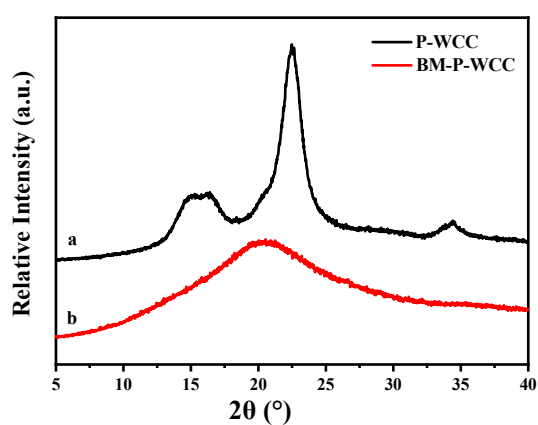

Figure S2. XRD spectrum of P-WCC (a) and BM- P-WCC (b).

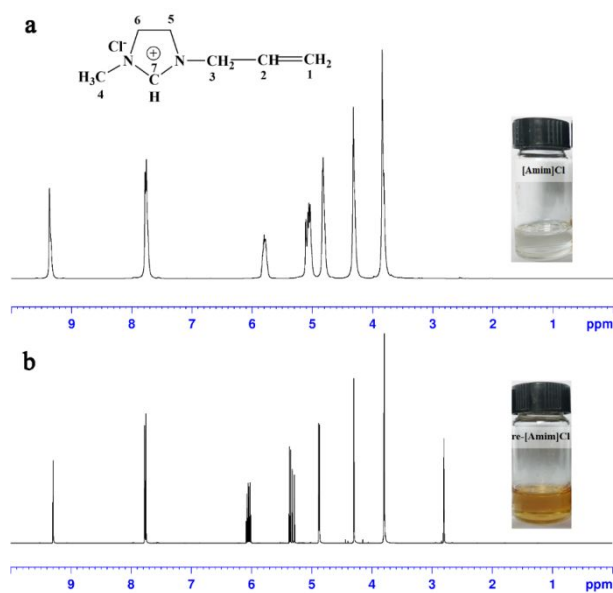

Figure S3. <sup>1</sup>H NMR spectra of [Amim]Cl (a) and recovered [Amim]Cl (b). (Photograph courtesy of 'Mingzi Xu'. Copyright 2020. The graphic is free domain)

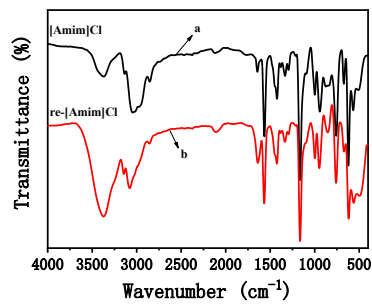

Figure S4. FTIR spectra of [Amim]Cl (a) and recovered [Amim]Cl (b).

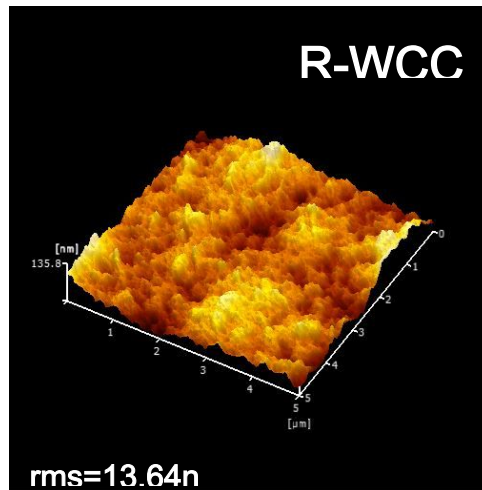

Figure S5. Surface roughness of the R-WCC film.

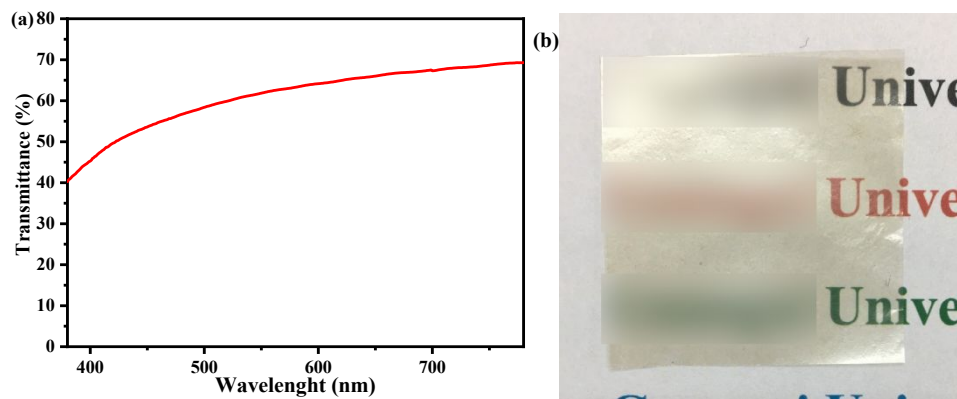

Figure S6. Transmittance (a) and visual pattern (b) of the R-WCC film.
